# Supplementary material for: Photochemical conversion of a cytidine derivative to a thymidine analog via [2+2]-cycloaddition
Source: Royal Society of Chemistry journal article supplement (doi:10.1039/c8pp00161h), 2018-06-12
Supplement: c8pp00161h1.pdf [file c8pp00161h1.pdf]

## Electronic Supplementary Material

### Photochemical Conversion of a Cytidine Derivative to a Thymidine Analog via [2+2]-Cycloaddition

Xiaoxu Li,<sup>a,b</sup> Ece Erturk,<sup>a,b</sup> Xin Chen,<sup>a,b</sup> Shiv Kumar,<sup>a,b</sup> Cheng Guo,<sup>a,b</sup> Steffen Jockusch,<sup>c</sup>  
James J. Russo,<sup>a,b</sup> Timothy H. Bestor,<sup>d</sup> Jingyue Ju<sup>\*a,b,e</sup>

<sup>a</sup>Center for Genome Technology and Biomolecular Engineering, Columbia University, New York, NY 10027;

<sup>b</sup>Department of Chemical Engineering, Columbia University, New York, NY 10027;

<sup>c</sup>Department of Chemistry, Columbia University, New York, NY 10027;

<sup>d</sup>Department of Genetics and Development, College of Physicians and Surgeons of Columbia University, New York, NY 10032;

<sup>e</sup>Department of Pharmacology, Columbia University College of Physicians and Surgeons, New York, NY 10032

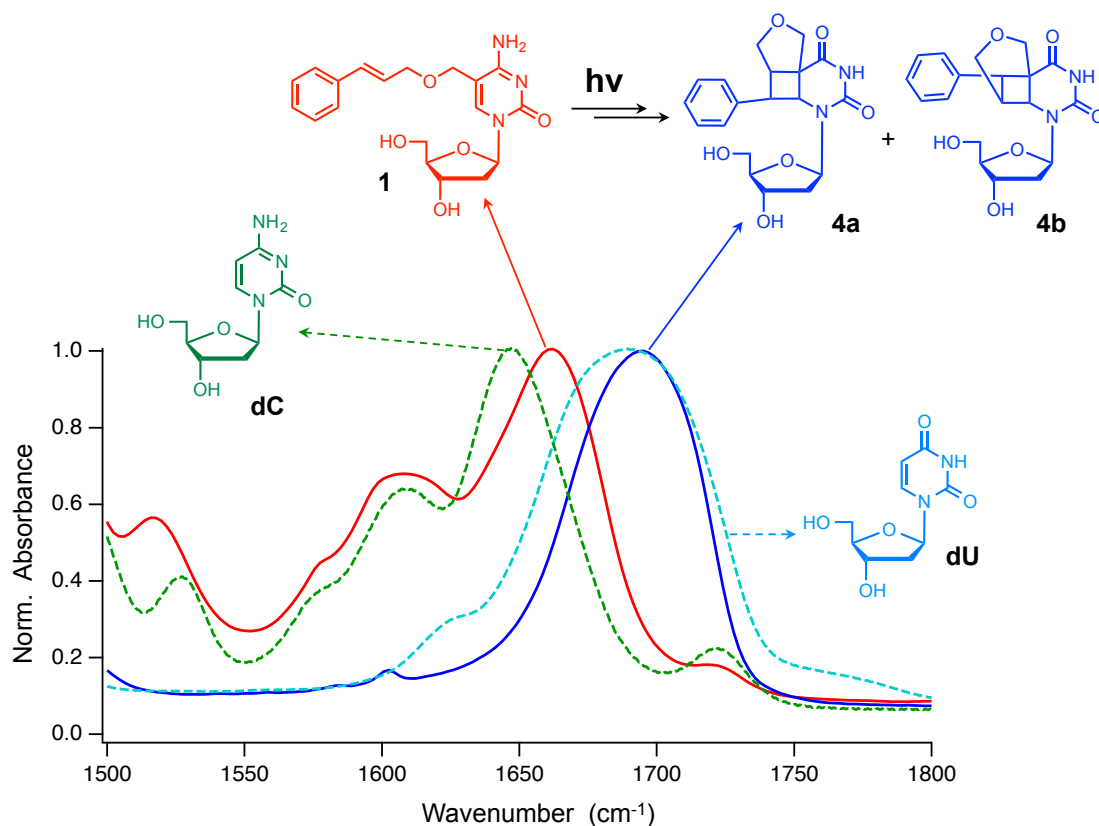

**Figure S1:** FT-IR spectra in the carbonyl spectral region of **1**, purified photoproduct **4a/4b**, **dC** and **dU** on CaF<sub>2</sub> disks.

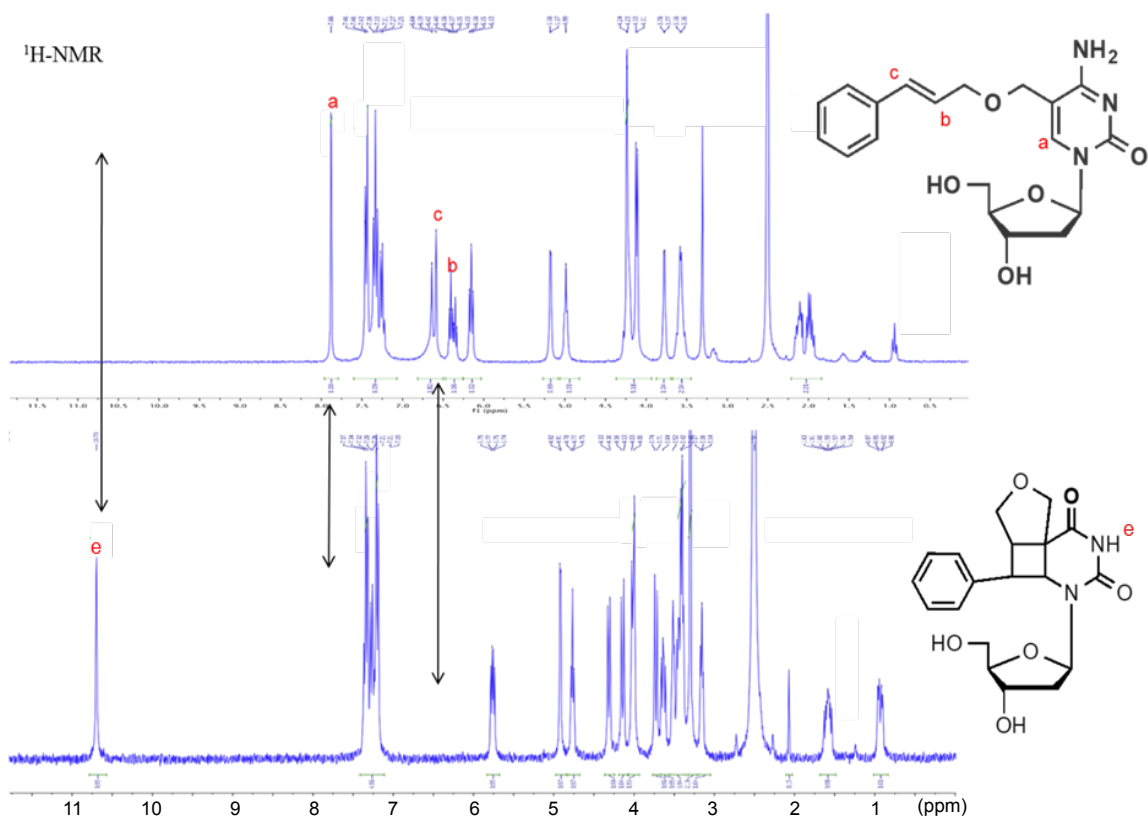

**Figure S2:**  $^1\text{H-NMR}$  analysis of **1** (top) and isolated photoproduct **4** (bottom) in  $\text{DMSO-}d_3$ . In the photoproduct, protons a, b, and c (marked in red) are upfield shifted due to the loss of the double bond. In addition, the amide proton e (marked in red) is evident in the photoproduct. For simplicity, only the straight [2+2]-cycloadduct is shown.

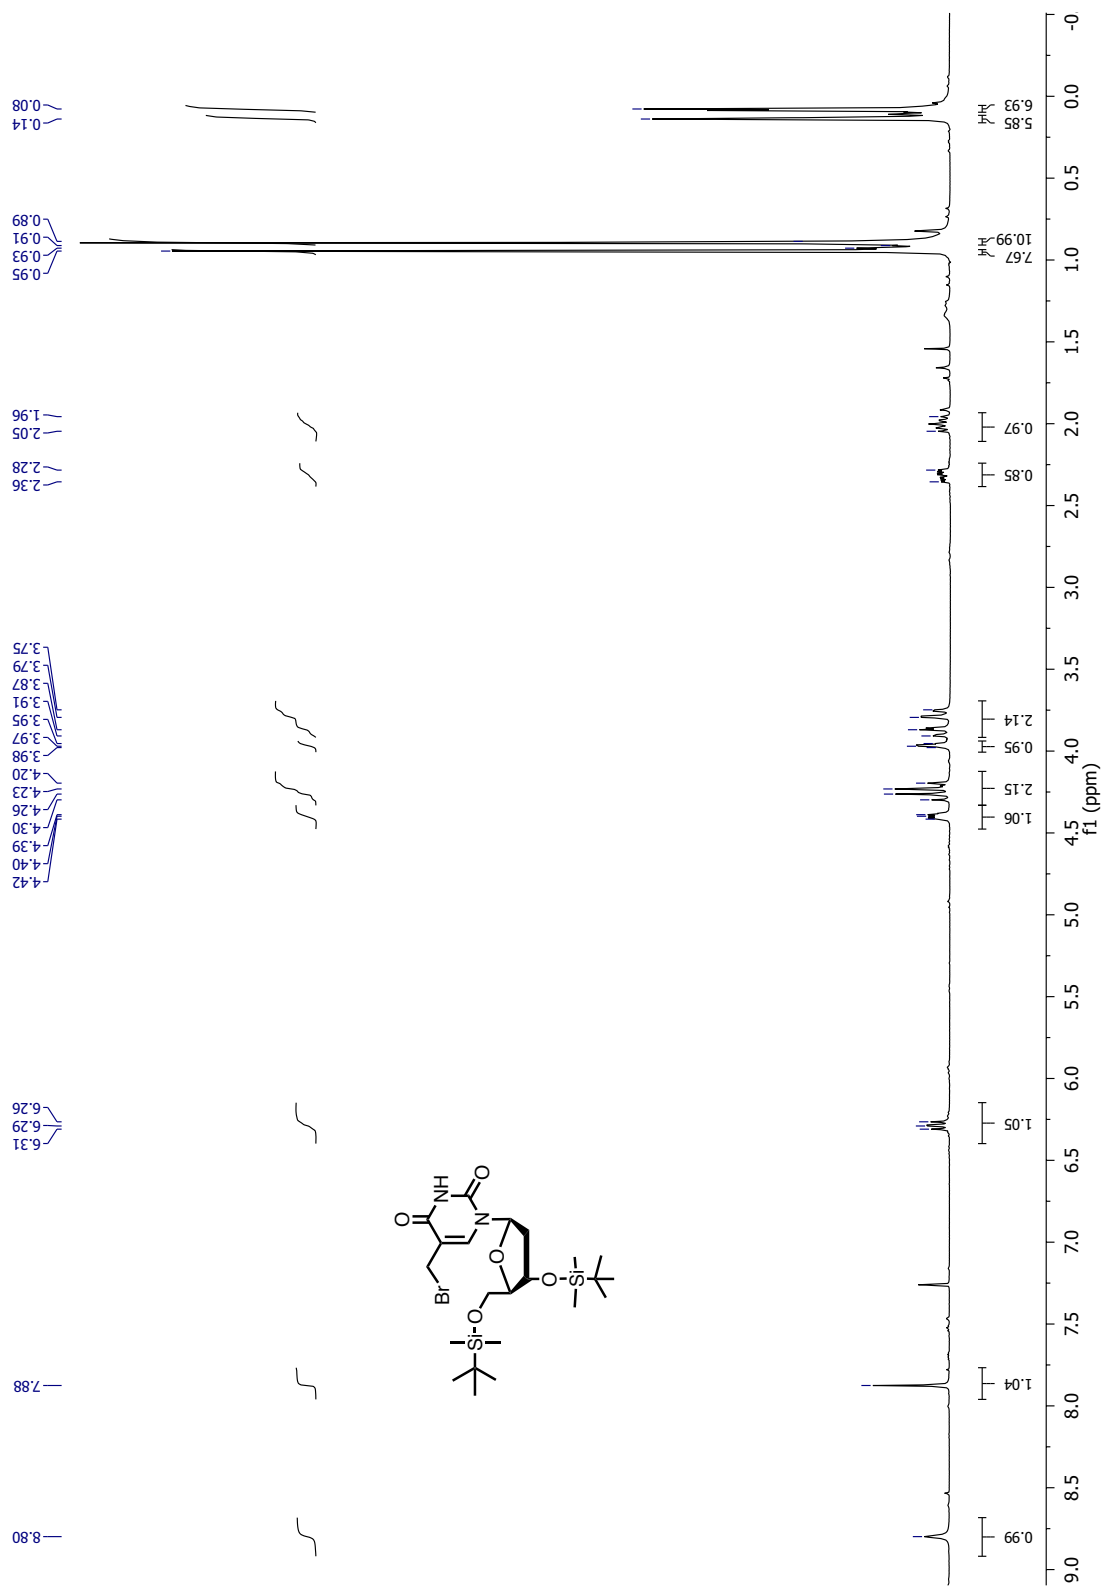

**Figure S3:** <sup>1</sup>H-NMR of 3'-5'-bis-*O*-(*tert*-butyldimethylsilyl)-thymidine (6) in CDCl<sub>3</sub>.



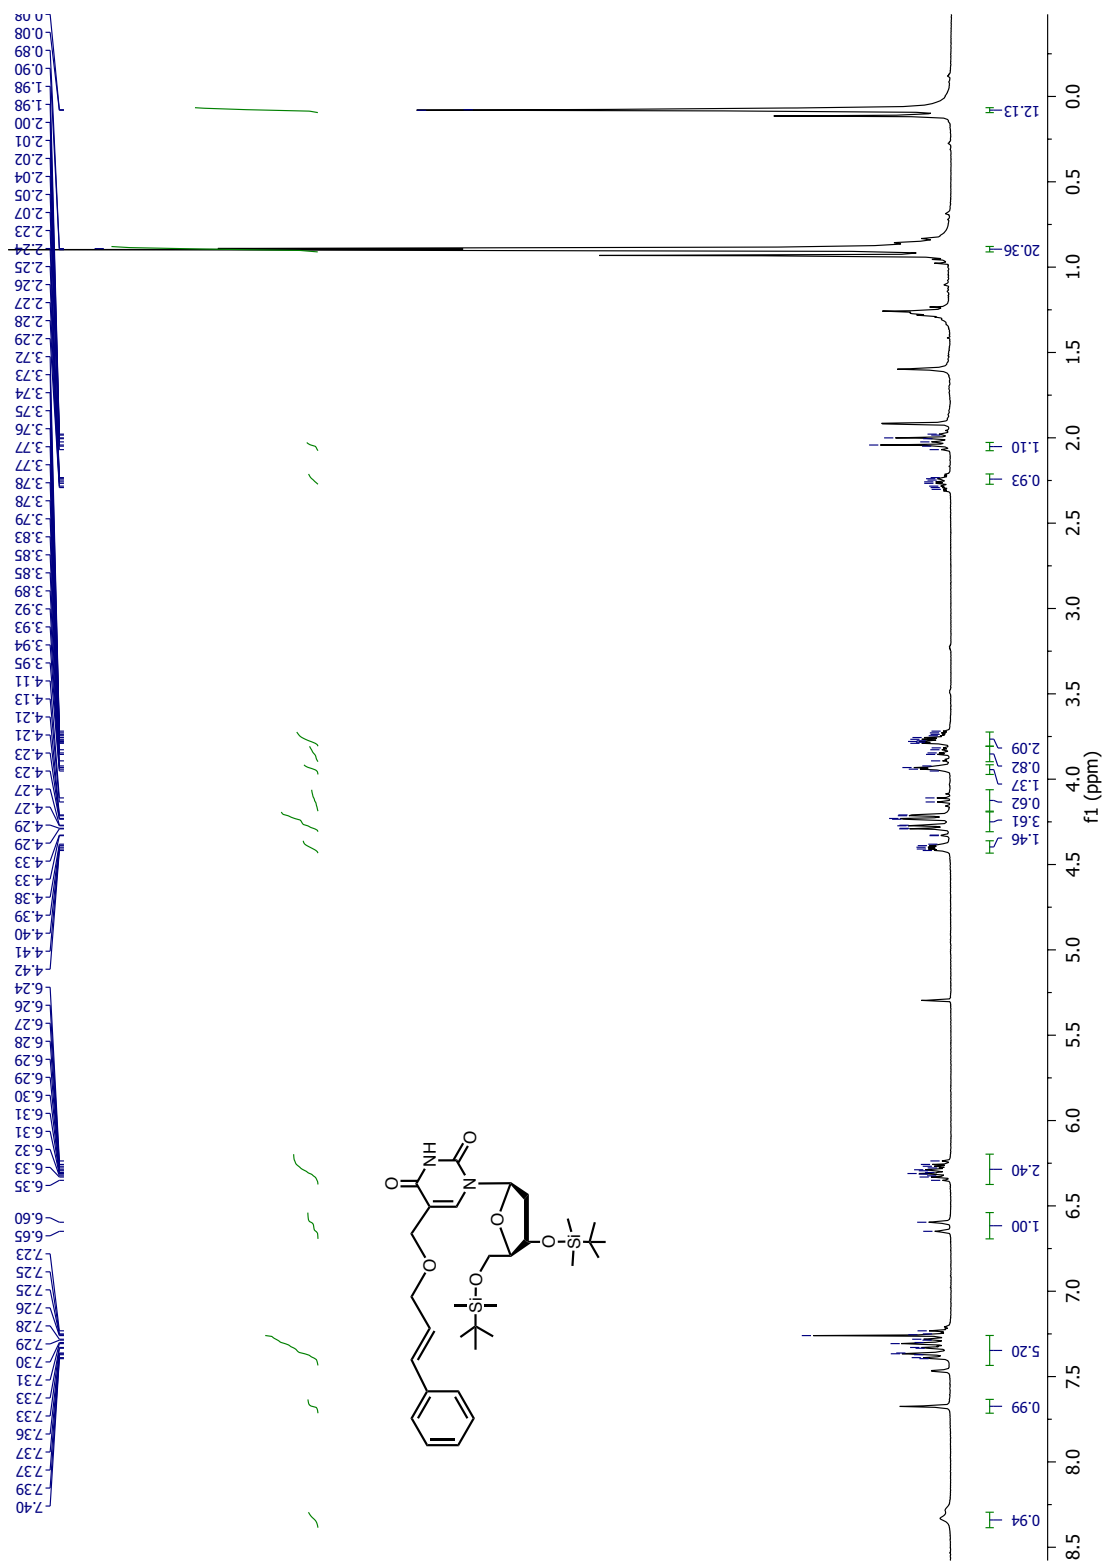

**Figure S5:** <sup>1</sup>H-NMR of 3'-5'-bis-*O*-(*tert*-butyldimethylsilyl)-5-cinnamyloxymethyl-deoxyuridine (**8**) in CDCl<sub>3</sub>.

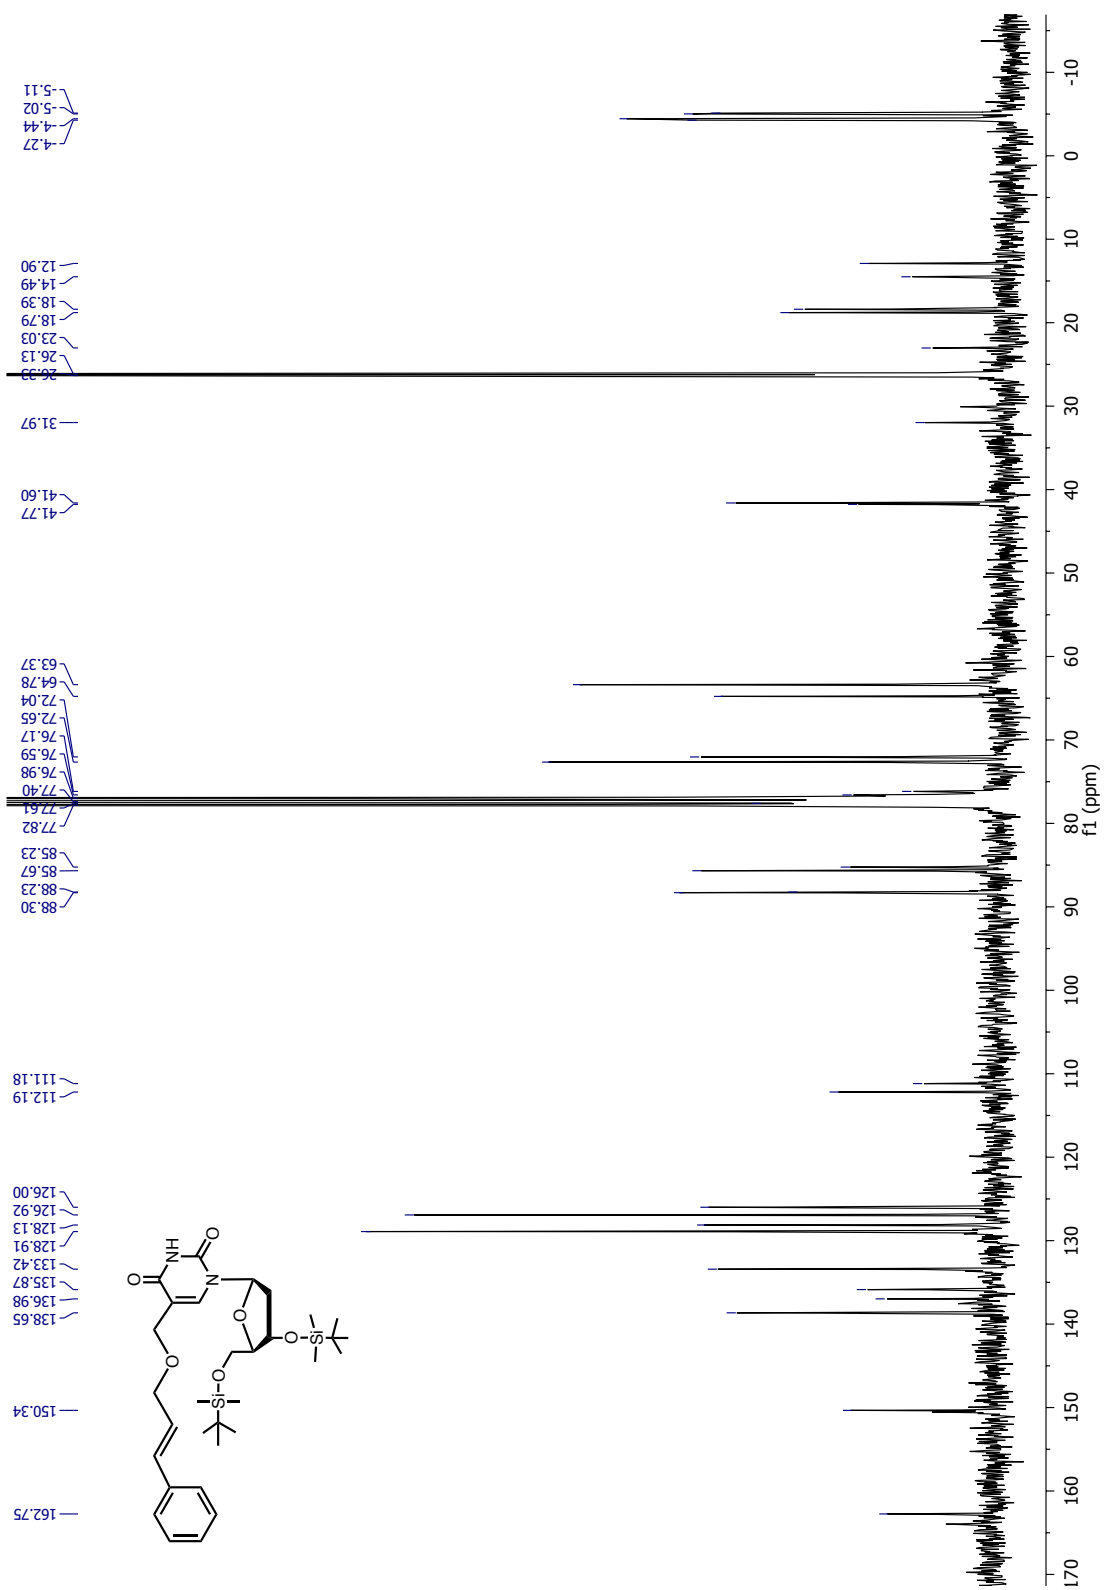

**Figure S6:**  $^{13}\text{C}$ -NMR of 3'-5'-bis-*O*-(*tert*-butyldimethylsilyl)-5-cinnamyl oxymethyl-deoxyuridine (**8**) in  $\text{CDCl}_3$ .

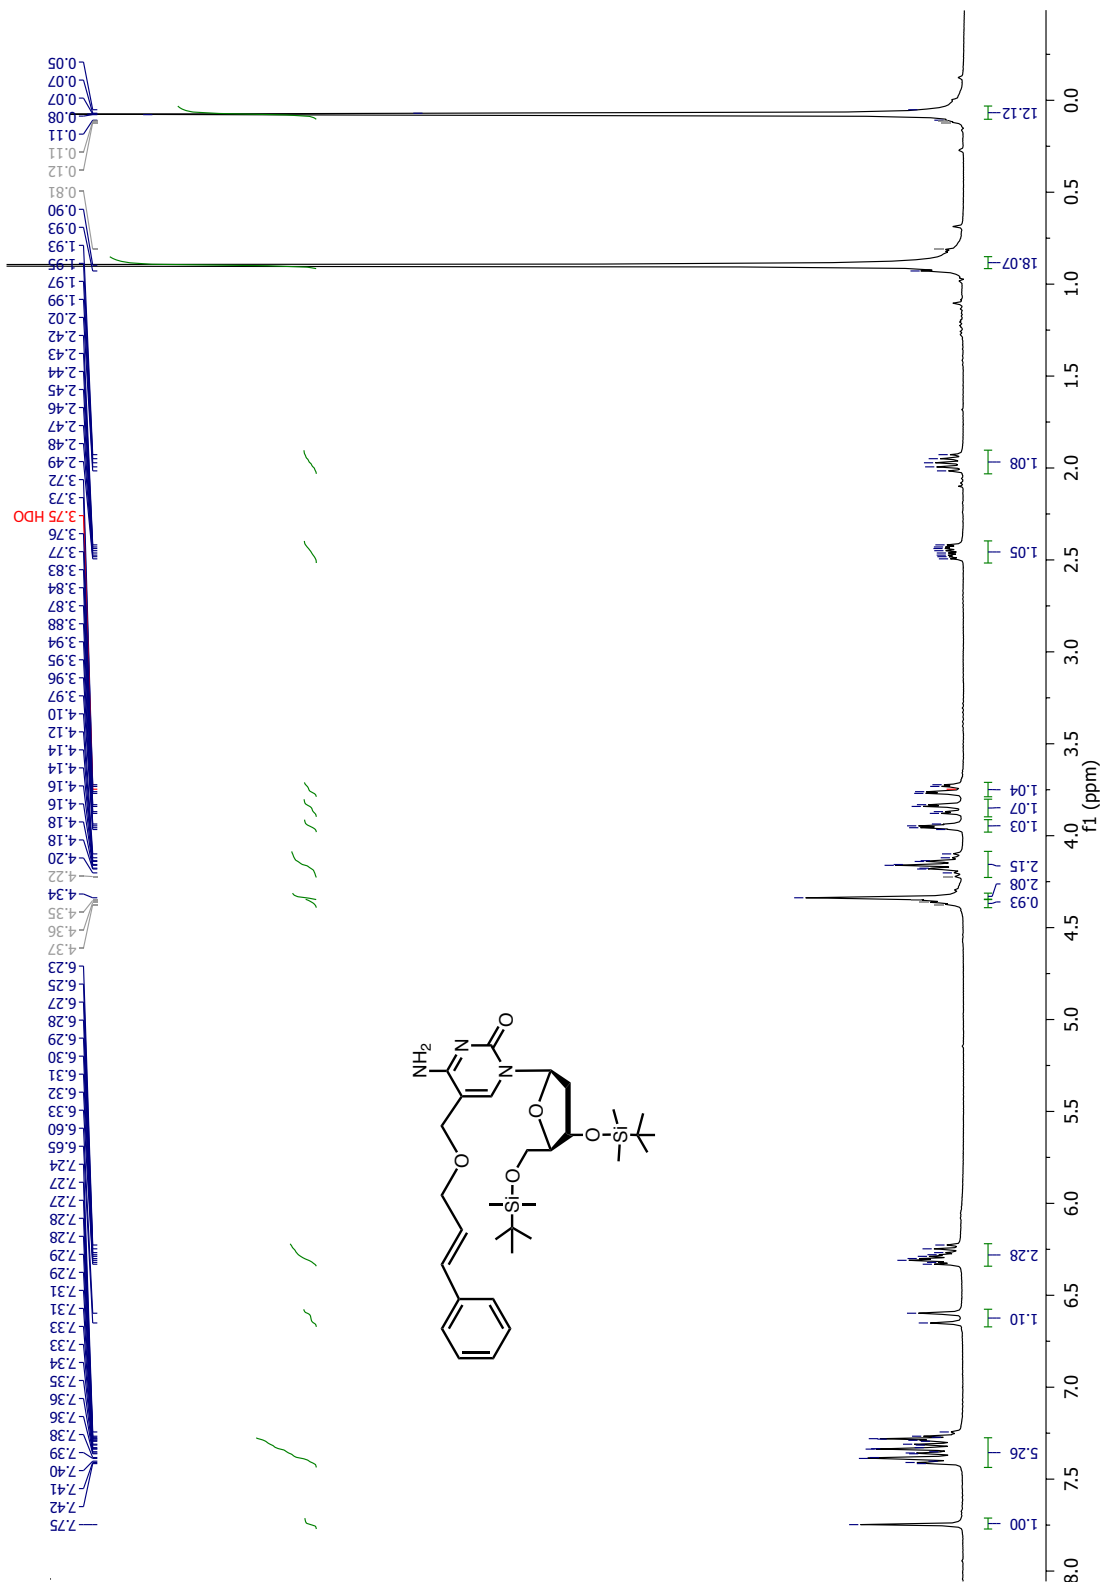

**Figure S7:** <sup>1</sup>H-NMR of 3'-5'-bis-O-(*tert*-butyldimethylsilyl)-5-cinnamyloxymethyl-deoxycytidine (**10**) in CDCl<sub>3</sub>.

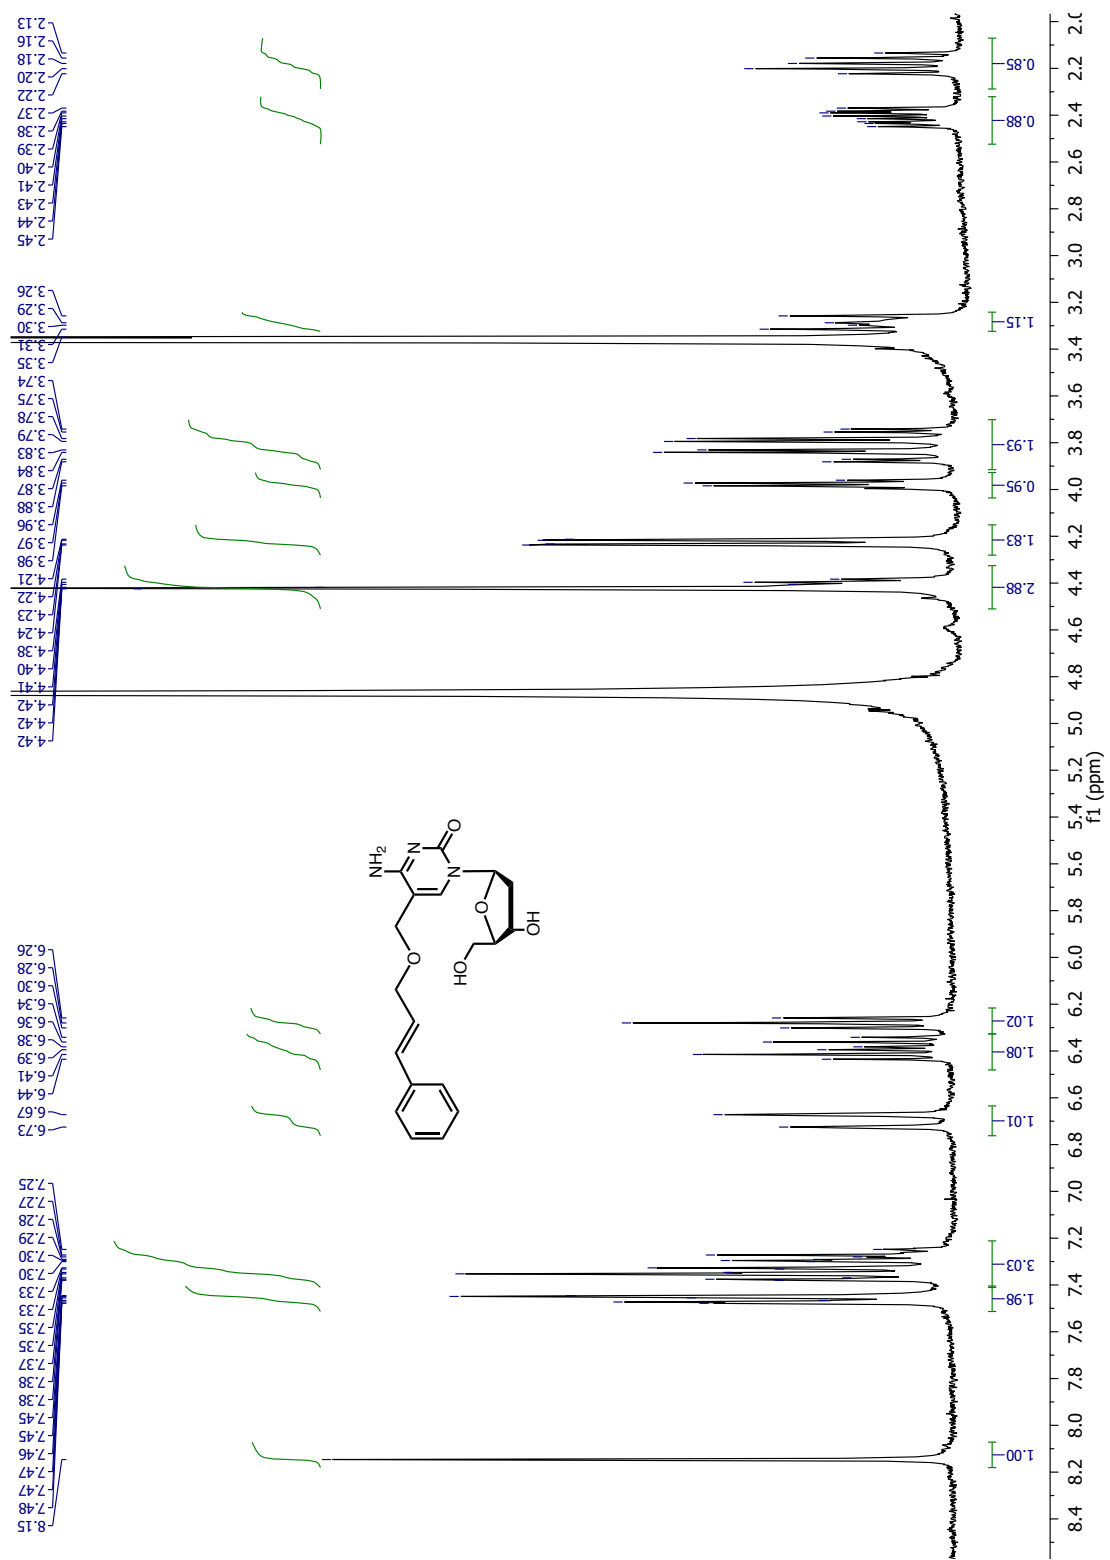

**Figure S8:** <sup>1</sup>H-NMR of 5-cinnamyloxymethyl-deoxycytidine (**1**) in CDCl<sub>3</sub>.



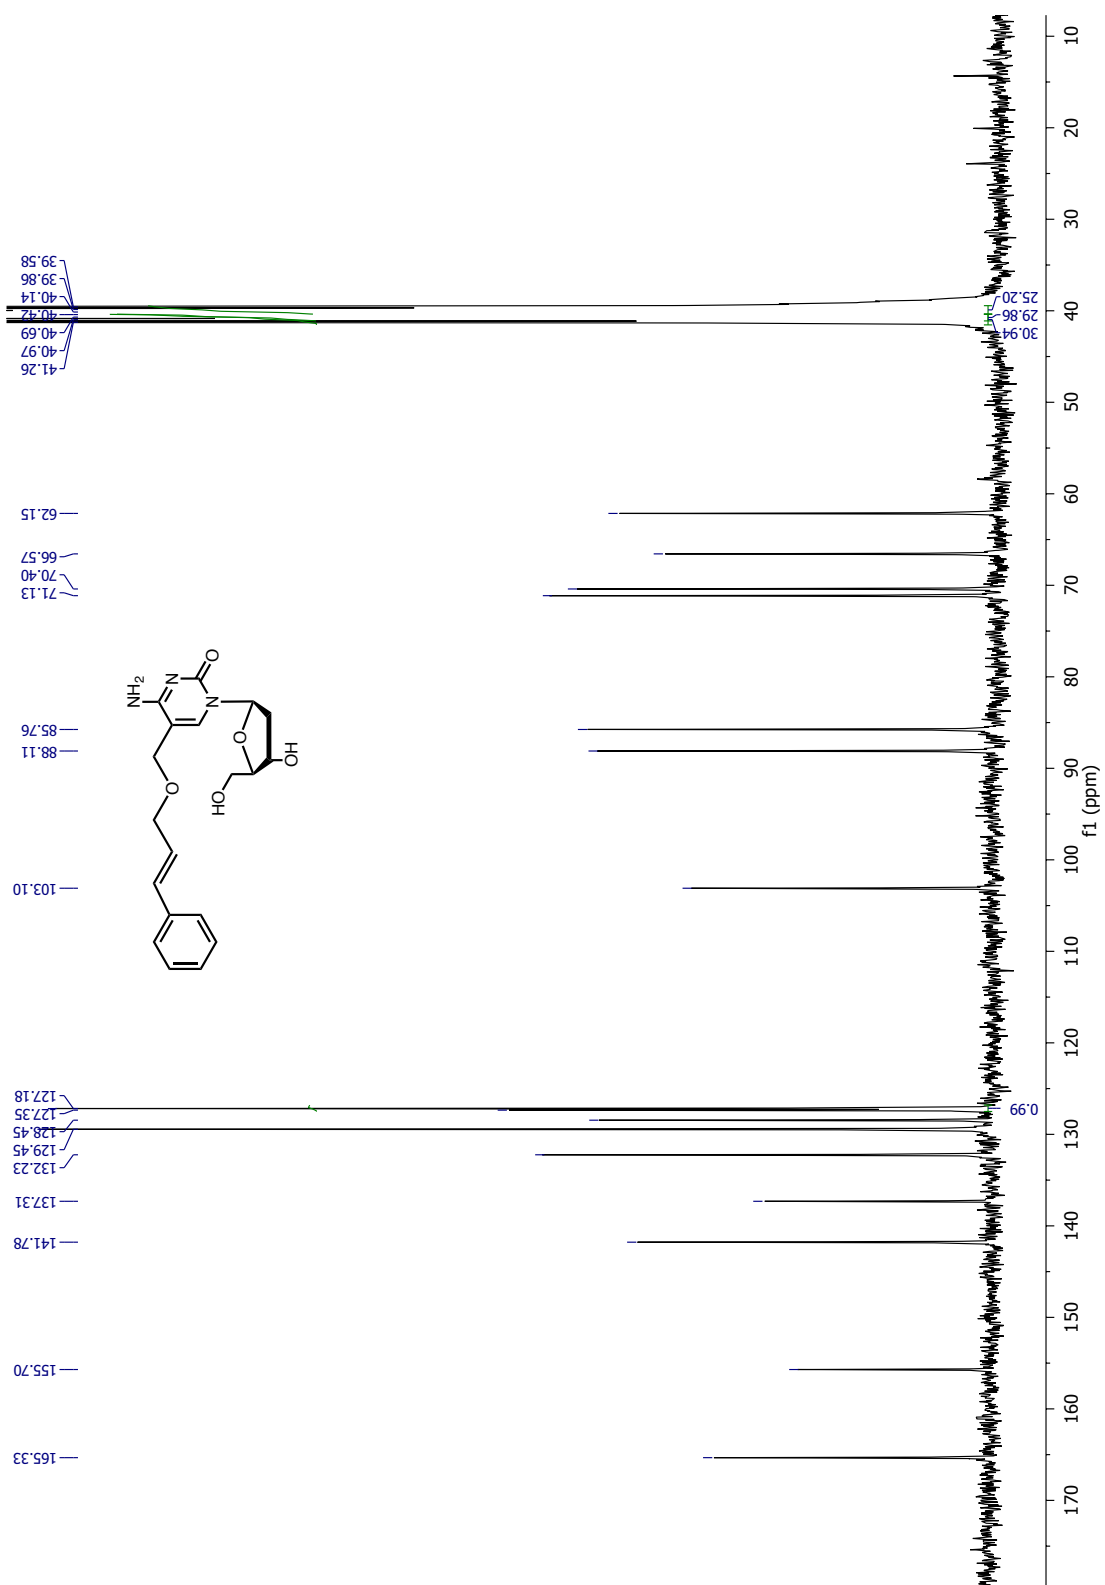

**Figure S9:**  $^{13}\text{C}$ -NMR of 5-cinnamyloxymethyl-deoxycytidine (**1**) in  $\text{CDCl}_3$ .

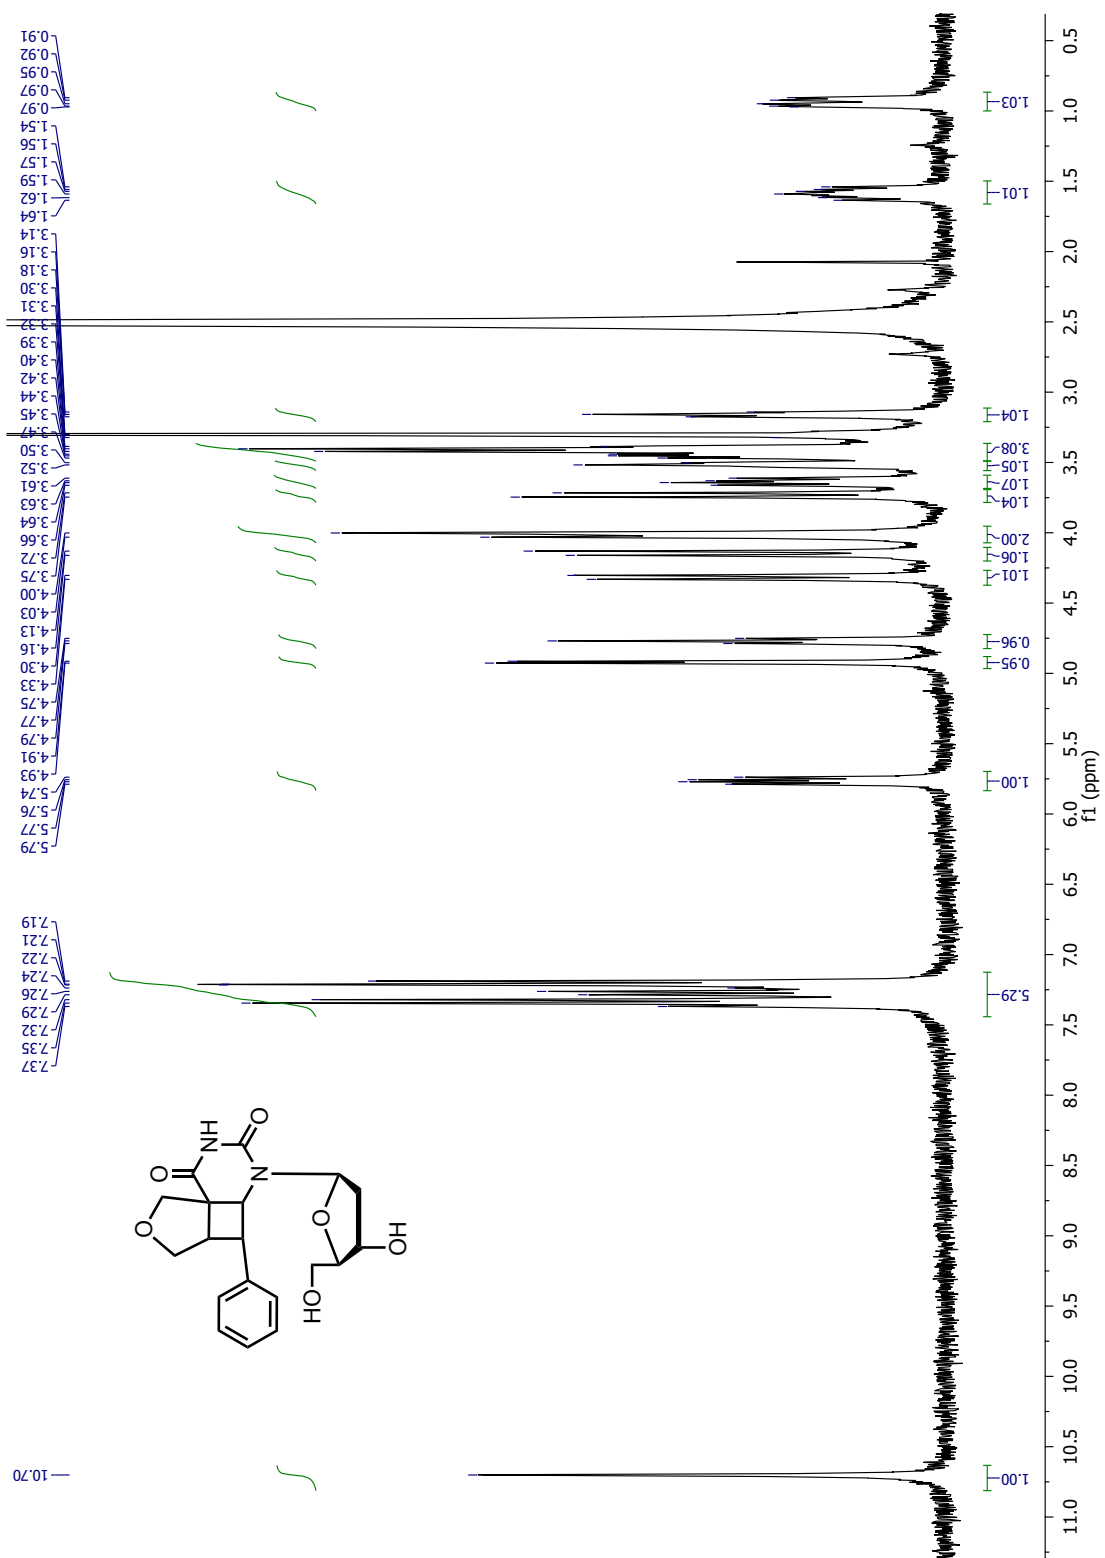

Figure S10:  $^1\text{H-NMR}$  of photoproduct 4 in  $\text{DMSO-}d_3$ .

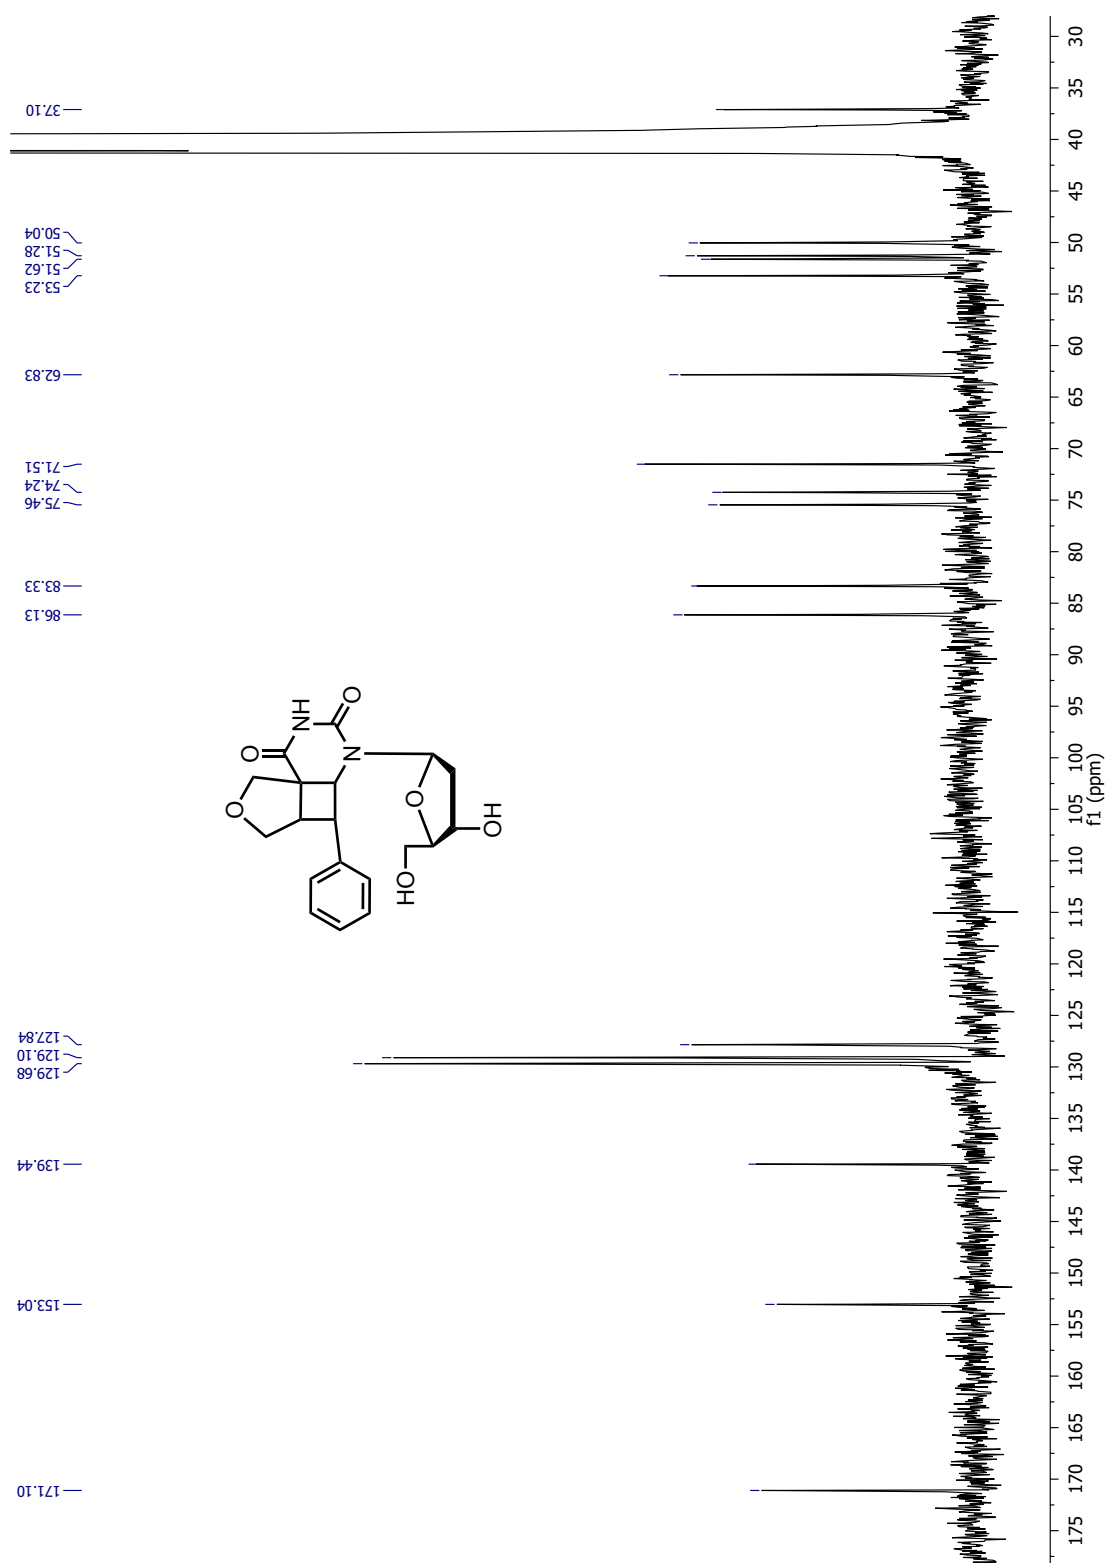

**Figure S11:**  $^{13}\text{C}$ -NMR of photoproduct 4 in  $\text{DMSO-}d_3$ .
